# Supplementary material
Source: PubMed Central journal article supplement (PMC5363482)
Supplement: SupplementaryMaterial_455.pdf [file SupplementaryMaterial_455.pdf]

## SUPPLEMENTAL MATERIAL

Partial white and grey matter protection with prolonged infusion of recombinant  
human erythropoietin after asphyxia in preterm fetal sheep

Guido Wassink, MSc, Joanne O. Davidson, PhD, Simerdeep K. Dhillon, MSc,  
Mhoyra Fraser, PhD, Robert Galinsky, PhD, Laura Bennet, PhD, Alistair J. Gunn,  
MBChB, PhD

Department of Physiology, University of Auckland, New Zealand

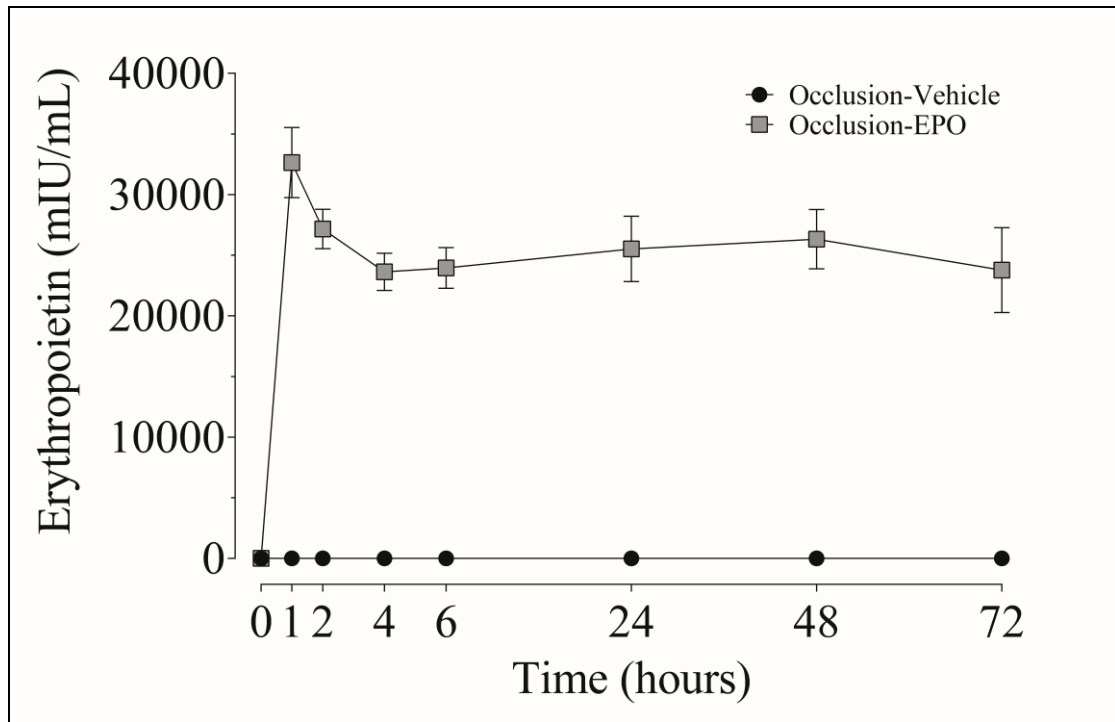

Supplementary Figure 1. Fetal arterial plasma Epo concentrations (in mU/mL) in the occlusion-vehicle (closed circles) and occlusion-EPO (closed squares) animals at 60 min before the occlusion (baseline), and 1, 2, 4, 6, 24, 48, and 72 h after umbilical cord occlusion. Epo was administered intravenously (i.v.) from 30 min until 72 h (loading bolus 5000 U, followed by an infusion of 833.25 U/h (2500 U/mL at 0.333 mL/h). Erythropoietin, Epo. Data are mean  $\pm$  SEM.

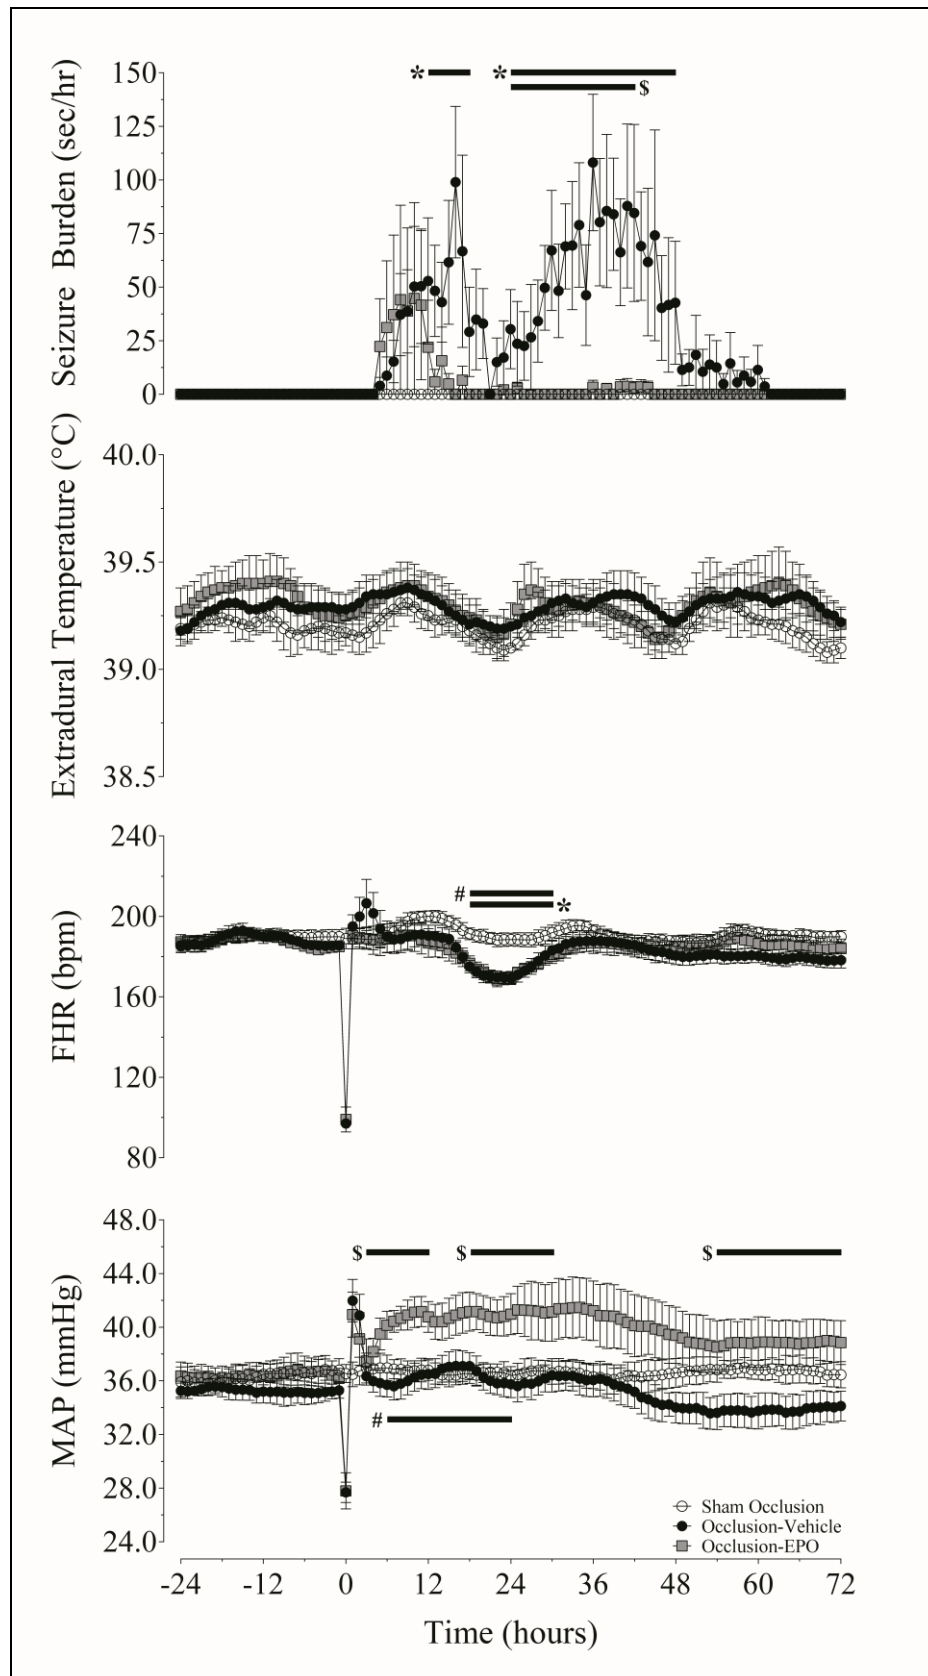

Supplementary Figure 2. Changes in seizure burden (sec/h), extradural temperature (°C), fetal heart rate (FHR, bpm), and mean arterial pressure (MAP, mmHg) in the sham occlusion (open circles), occlusion-vehicle (closed circles), and occlusion-EPO animals (closed squares). Time point zero denotes the 25 min period of umbilical cord occlusion. Erythropoietin, Epo. Data are hourly averages and presented as mean  $\pm$  SEM. \*P<0.05, occlusion-vehicle *vs.* sham occlusion; #P<0.05, occlusion-EPO *vs.* sham occlusion; \$P<0.05, occlusion-vehicle *vs.* occlusion-EPO.

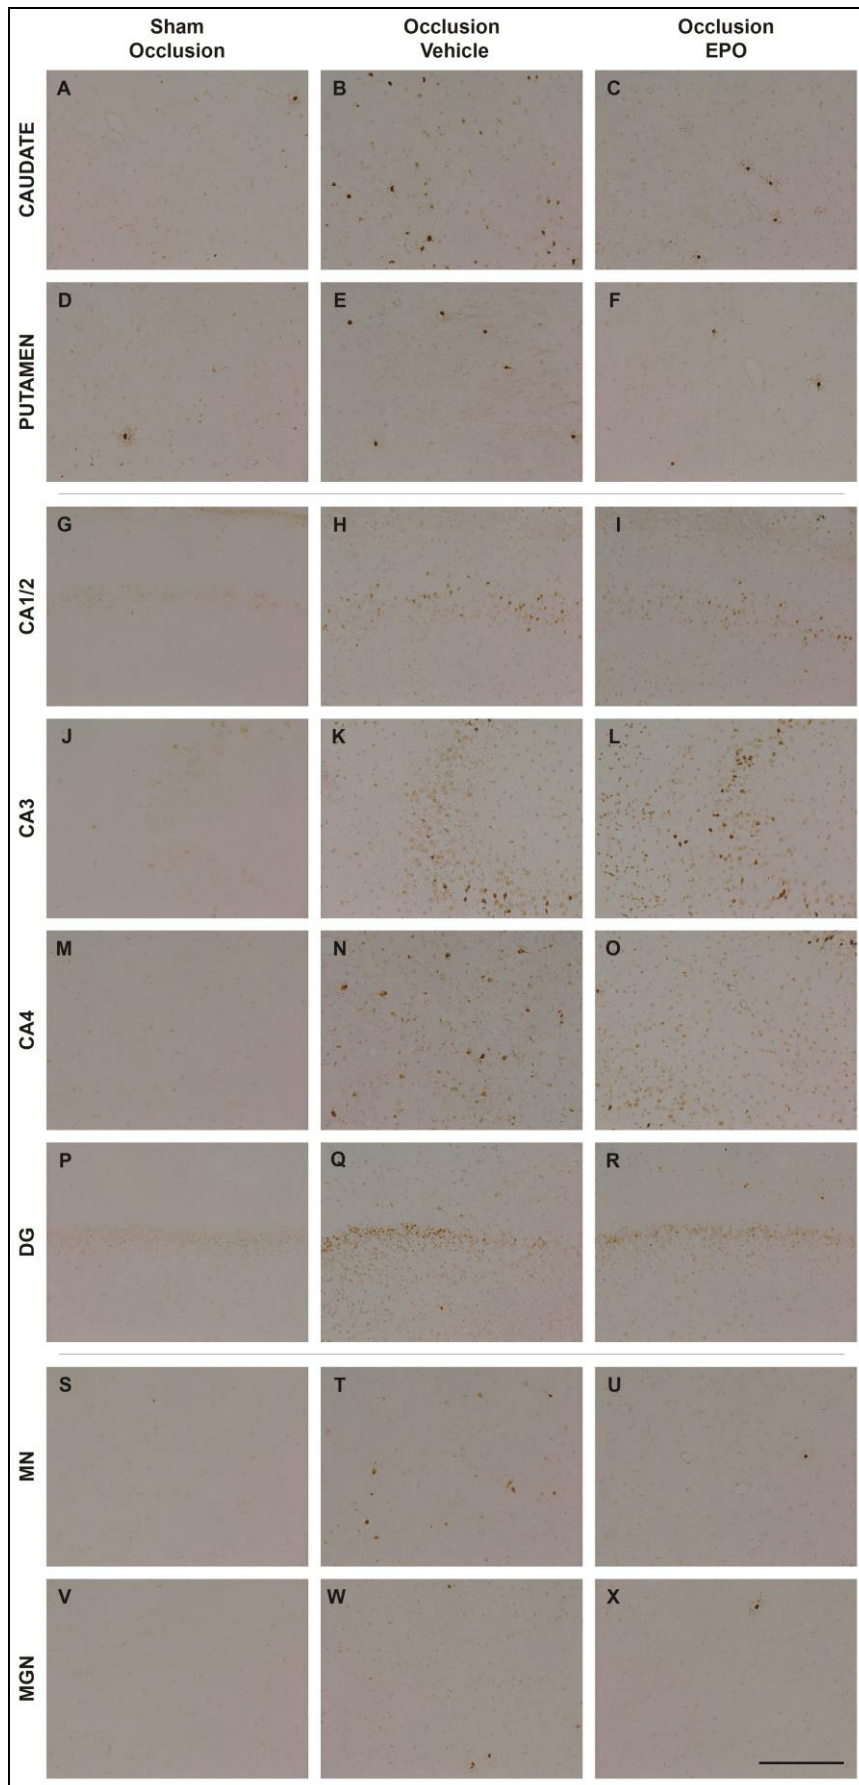

Supplementary Figure 3. Photomicrographs of caspase3 -positive cells in the striatal caudate nucleus (caudate, panel A-C) and putamen (panel D-F), CA1/2 (panel G-I), CA3 (panel J-L), CA4 (panel M-O) and dentate gyrus (DG, panel P-R) of the hippocampus, and thalamic medial nucleus (MN, panel S-U) and medial geniculate nucleus (MGN, panel V-X) from the sham occlusion (left column), occlusion-vehicle (middle column), and occlusion-EPO (right column) groups at 3 days after severe asphyxia. Scale bar is 200  $\mu$ m.

Supplementary Table 1. Fetal post-mortem findings

| Group    | N | Fetus (g)  | Brain (g)   | Heart (g)  | Liver (g)    | Kidney (g) | Singleton : Twin | Female : Male |
|----------|---|------------|-------------|------------|--------------|------------|------------------|---------------|
| SHAM     | 9 | 1507 ± 54  | 29.3 ± 0.9  | 13.0 ± 0.8 | 64.2 ± 3.6   | 7.7 ± 0.6  | 7 : 2            | 4 : 5         |
| OCCL-VEH | 9 | 1680 ± 106 | 25.2 ± 0.7* | 12.2 ± 0.5 | 76.7 ± 3.0   | 7.3 ± 0.4  | 8 : 1            | 5 : 4         |
| OCCL-EPO | 8 | 1460 ± 64  | 26.4 ± 0.8  | 13.1 ± 0.6 | 106.8 ± 6.9# | 7.1 ± 0.2  | 4 : 4            | 6 : 2         |

Fetal biological parameters for the sham occlusion (SHAM), occlusion-vehicle (OCCL-VEH), and occlusion-erythropoietin (OCCL-EPO) animals. Weights are gram (g). Data are mean ± SEM; between-group comparisons by Kruskal-Wallis ANOVA. \*P <0.05 vs. sham occlusion; #P <0.05 vs. sham occlusion and occlusion-vehicle.
